# Supplementary material
Source: publisher site journal article supplement (https://static.cambridge.org/content/id/urn:cambridge.org:id:article:S0016756820000084/resource/name/S0016756820000084supp001.zip)
Supplement: Supplementary file 1 [file S0016756820000084supp001.zip]

Archive with 6 entries (6 files):
- S0016756820000084supp001.pdf
- S0016756820000084supp002.pdf
- S0016756820000084supp003.xlsx
- S0016756820000084supp004.xlsx
- S0016756820000084supp005.pdf
- S0016756820000084supp006.pdf
