# Supplementary material
Source: publisher site journal article supplement (https://static.cambridge.org/content/id/urn:cambridge.org:id:article:S0016756820000084/resource/name/S0016756820000084supp001.zip)
Supplement: Supplementary file 1 [file S0016756820000084supp001.zip › S0016756820000084supp002.pdf]

# Triassic Magmatism in Southern Alps as an Early Phase of Pangea Break-up

by De Min A., Velicogna M., Ziberna L., Chiaradia M., Alberti A. & Marzoli A.

## Supplementary Figure S2

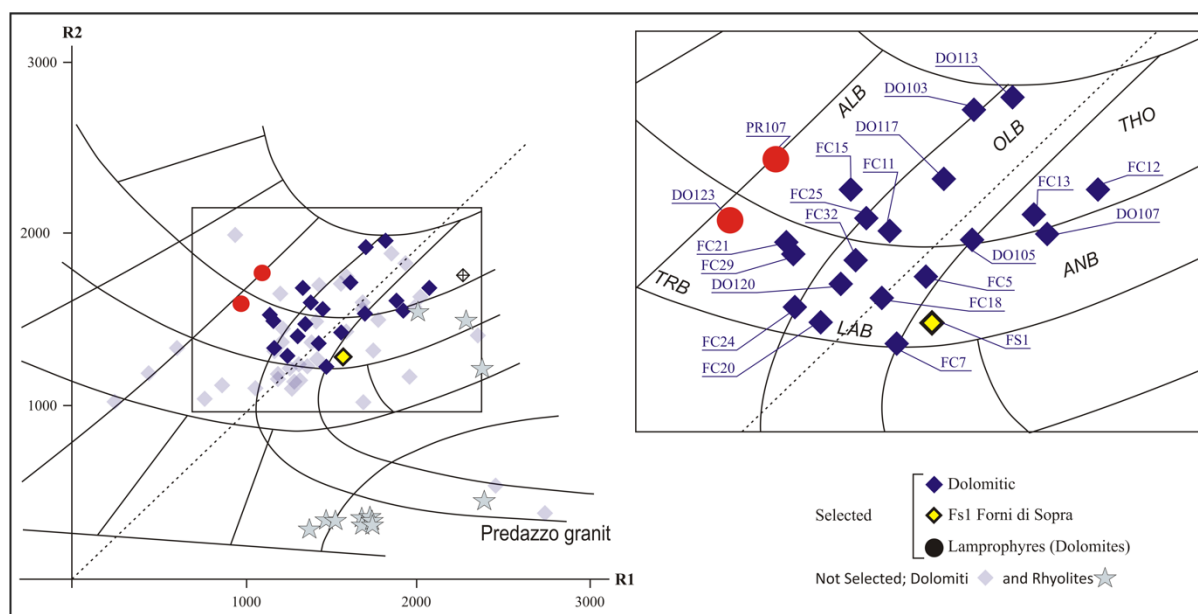

Classification of the magmatic rocks from the Dolomites and Carnic Alps based on De La Roche et al. (1980). TRB – Trachi-basalt, ALB – Alkali-basalt, LAB – Lati-basalt, OLB – Olivine-basalt, ANB – Andesi-basalt, THO – Tholeiite. Symbols as in Fig. 4.
