# Supplementary material
Source: publisher site journal article supplement (https://static.cambridge.org/content/id/urn:cambridge.org:id:article:S0016756820000084/resource/name/S0016756820000084supp001.zip)
Supplement: Supplementary file 1 [file S0016756820000084supp001.zip › S0016756820000084supp003.xlsx]

## Sheet: S1a
Geological Magazine
Triassic Magmatism in Southern Alps as an Early Phase of Pangea Break-up
by De Min A., Velicogna M., Ziberna L., Chiaradia M., Alberti A., Marzoli A.
Supplementary Table S1a: Selected samples not shown in Table 2
Major and some trace elements (normalized to 100 wt% anhydrous) analysed through a X-ray fluorescence spectrometer Philips 1404 at the Department of Mathematics and Geosciences, University of Trieste (samples FC7 to PR107amph)
and a WDS Philips PW2400 at the Department of Geosciences, University of Padova (samples CD1 to CD4)
Data in italics: Major and trace elements analysed though ICP-MS at ACME labs, Vancouver (FC11, PR107amph) and CRPG-CNRS Laboratory at Vandoeuvre les-Nancy (FC24)
		FC7	FC11	FC12	FC15	FC20	FC21	FC24	FC25	FC32	DO105	DO107	D0113	PR107amph	PR107WR*	CD1	CD2	CD3	CD4
		Mt. Mulat	Col Bel	Col Bel	Col Bel	Dos Capel	Dos Capel	Bulla	Bulla	Bulla	Cima Pape	Cima Pape	Val di Garès	Mt. Mulat	Mt. Mulat	Val Giumela	Val Giumela	Val Giumela	Val Giumela
SiO2		57.367	50.4505	53.772	53.454	56.529	52.232	51.206	49.373	51.047	53.5854	56.388	52.561	38.8484	44.53	50.7885	50.8497	50.802	53.2453
TiO2		0.68	1.04444	0.85	1.24	0.42	1.27	0.880872	0.98	0.89	0.97	0.89	1.01	3.85994	2.14	1.08488	1.13625	1.18027	1.1288
Al2O3		17.75	17.2025	14	16.44	21.73	20.19	14.9643	14.03	14.63	15.6	14.19	13.45	15.053	18.31	17.3481	17.7476	17.9865	19.0788
Fe2O3tot			11.11					11.9547						16.9076	13.66	9.04068	10.8396	11.0865	8.41564
FeOtot		6.41		10.41	7.91	3.83	6.27		13.02	11.83	9.03	7.84	8.68
MnO		0.16	0.174073	0.18	0.19	0.1	0.1	0.157299	0.24	0.2	0.00763889	0.16	0.25	0.206511	0.17	0.130588	0.180995	0.211843	0.161258
MgO		2.73	4.80238	5.72	3.02	1.43	2.97	7.63423	7.62	7.4	5.89	5.85	6.03	9.6625	3.96	4.88197	4.38411	3.56098	2.58012
CaO		7.03	9.28732	10.59	11.41	7.49	9.26	6.29195	8.95	7.8	8.85	9.31	13.11	11.1597	11.51	12.2451	9.21066	9.46232	6.6922
Na2O		3.54	2.68278	1.93	4.85	4.23	3.75	3.17743	2.05	2.89	2.43	3.44	2.86	2.62289	2.45	2.29031	2.67471	2.71361	5.35174
K2O		3.843	2.78517	2.218	1.066	3.841	3.398	3.37668	3.377	2.863	3.137	1.612	1.719	1.4881	2.46	1.86841	2.58421	2.59256	2.89256
P2O5		0.49	0.460782	0.33	0.42	0.4	0.56	0.356544	0.36	0.45	0.5	0.32	0.33	0.191327	0.81	0.321447	0.392157	0.403511	0.453538
L.O.I.			1.9					4.56						0.9	9.5	3.17	1.33	1.91	3.51
CIPW:
Quartz		3.42	0	4.56	0	0	0	0	0	0	0.52	4.34	0			0	1.08	0	0
Plagioclase		53.67	54.17	43.41	60.27	66.24	56.22	48.18	39.69	47.5	46.72	52.07	47.79			53.99	55.95	55.28	52.98
Orthoclase		24.95	19	15.23	7.13	24.33	22.13	23.08	23.41	19.62	21.18	10.88	11.86			15.71	15.87	20.49	21.76
Nepheline		0	0	0	3.48	0	3.8	0	0.51	0	0	0	0			0	0	0	8.06
Diopside		7.24	11.92	20.04	24.24	3.77	9.73	8.9	16.86	12.55	13.07	18.26	32.18			20.52	8.97	11.79	8.39
Hypersthene		7.84	3.59	13.11	0	2.4	0	0.21	0	3.07	14.69	11.31	0.65			2.13	14.27	2.64	0
Olivine		0	7.28	0	1.13	1.35	4.44	15.86	15.15	13.06	0	0	3.99			4.22	0	5.76	5.29
Ilmenite		0.77	1.23	1.01	1.44	0.46	1.44	1.04	1.18	1.06	1.14	1.04	1.21			1.27	1.36	1.38	1.28
Magnetite		1.11	1.83	1.92	1.43	0.65	1.1	1.97	2.42	2.17	1.63	1.42	1.61			1.49	1.8	1.81	1.32
Apatite		1	0.98	0.71	0.89	0.79	1.15	0.76	0.78	0.97	1.06	0.68	0.71			0.68	0.7	0.85	0.92
Rb		140	71.8	43	22	104	76	69.2	77	89	61	26	34	7.372	48	51	59	54	66
Ba		578	501	400	254	610	588	620	576	463	512	285	324	261	437	344	484	499	512
Th			6.4					6.52						0.108	3.9	3	3	3	3
U			1.7					1.8						0.046	1.2	3	4	3	3
Nb		13	9.6	11	11	8	11	7.23	9	11	13	9	11	32.24	50.3	8	10	8	11
Pb			4.8					7.57						2.1544	5.2	13	17	16	27
Sr		869	804.8	723	723	1207	977	498	1441	664	991	616	673	704.8	952	621	775	774	608
Zr		185	148.5	117	180	86	184	121	118	130	168	130	159	105.1	241	115	154	154	156
Y		31	24.5	24	26	22	27	22.9	31	29	29	27	27	32.09	29	25	27	27	26
Cr		19	84.021	191	106	3	17	80.9	101	103	52	338	422	11.81	87	0
Ni		12	10	45	34	8	7	21.1	29	25	23	49	65	26.06	44	55	34	30	28
Hf			4.3					3.13						3.057	5.4
La		30	27	21	29	32	24	25.9	25	23	30	19	24	10.3	36.7	22	21	28	20
Ce		64	60.5	46	60	63	51	55	48	49	60	47	52	32.94	80.7	37	57	38	59
Pr			7.17					6.91						5.49	8.9
Nd		32	29.1	24	33	28	27	28.6	28	24	34	25	24	27.5	35.4	17	22	20	21
Sm			5.7					6.11						7.1	6.5
Eu			1.63					1.56						2.417	2.2
Gd			5.26					5.41						6.899	6.1
Tb			0.82					0.786						1.048	1
Dy			4.48					4.27						6.111	5.6
Ho			0.87					0.826						1.175	1.1
Er			2.38					2.17						3.098	3
Tm			0.34					0.299						0.418	0.4
Yb			2.26					2.14						2.665	2.7
Lu			0.36					0.34						0.382	0.4
* Whole-rock composition calculated by mixing 85 wt% of groundmass (sample PR107GR) and 15% of amphibole megacrysts (sample PR107amph)

## Sheet: S1b
Geological Magazine
Triassic Magmatism in Southern Alps as an Early Phase of Pangea Break-up
by De Min A., Velicogna M., Ziberna L., Chiaradia M., Alberti A., Marzoli A.
Supplementary Table S1b: More altered samples discarded during the selection
Major and some trace elements (normalized to 100 wt% anhydrous) analysed through a X-ray fluorescence spectrometer Philips 1404 at the Department of Mathematics and Geosciences, University of Trieste
Label	FC1	FC2	FC3	FC4	FC6	FC9	FC19	FC22	FC23	FC16	FC17	FC26	FC27	FC28	FC33	FC30	FC31	DO102	DO104	DO106	DO108	DO111	DO112	DO114	DO115	DO125	DO119	DO127	DO128	DO130	DO131	DO132	DO134	DO135	DO133	FS2	FS3	FS5	FS6	SL1	SL2	SL3	SL4	SL5	SL6	SL7	SL8	SL9	SL10
Locality	Mt. Mulat	Mt. Mulat	Mt. Mulat	Mt. Mulat	Mt. Mulat	Mt. Mulat	Dos Capel	Dos Capel	Dos Capel	Col Bel	Col Bel	Bulla	Bulla	Bulla	Bulla	Frommer	Frommer	Cima Pape	Cima Pape	Cima Pape	Cima Pape	Cima Pape	Val di Garès	Val di Garès	Val di Garès	Marmolada	Marmolada	Colle S.Lucia	Colle S.Lucia	F.di Sotto	F.di Sotto	F.di Sotto	F.di Sotto	F.di Sotto	F.di Sotto	F.di Sopra	F.di Sopra	F.di Sopra	F.di Sopra	Rio Profondo	Rio Profondo	Rio Profondo	Rio Profondo	Rio Profondo	Rio Profondo	Rio Profondo	Rio Profondo	Rio Profondo	Rio Profondo
SiO2	56.852	60.341	52.912	52.558	53.927	58.327	55.068	53.035	55.011	52.853	56.66	54.463	53.049	49.963	53.702	51.34	49.787	51.367	50.328	50.176	51.038	55.474	50.103	49.091	53.489	54.516	56.271	52.297	51.138	53.095	54.272	53.702	52.162	52.403	53.86	54.757	53.687	52.779	53.487	68.878	69.271	71.538	70.427	69.597	71.028	59.753	71.094	70.919	72.422
TiO2	0.71	0.67	1.3	1.43	0.85	0.69	0.77	0.73	0.72	1.22	0.79	0.76	0.79	0.94	0.85	0.93	1	1.15	1.06	1.18	1.07	0.88	1.21	1.13	0.93	0.82	0.93	1.26	1.25	1.57	1.37	1.49	1.51	1.46	1.38	1.25	1.08	1.39	1.25	0.2	0.17	0.17	0.19	0.19	0.21	1.06	0.18	0.22	0.21
Al2O3	18.19	16.49	16.83	14.61	14.94	16.48	17.84	16.61	17.9	17.03	14.86	17.57	17.65	12.07	17.15	14.07	14.36	15.88	11.51	16.13	15.54	16.65	17.47	15.69	13.87	14.73	17.98	18.57	17.89	18.23	16.98	18.86	17.54	17.32	18.72	16.33	16.3	17.61	17.66	16.18	15.67	14.49	14.85	15.6	14.77	17.4	14.98	14.83	14.61
FeOtot	6.51	6.17	8.79	10.01	9.63	8.88	8.52	9.47	7.9	8.12	9.27	8.94	10.04	12	9.34	11.95	11.82	10.55	12.61	11.05	8.78	9.79	5.52	10.8	8.28	8.31	7.87	8.96	9.36	9.7	8.83	8.08	10.61	10.01	8.82	8.71	9.34	8.53	8.83	2.4	2.19	2.01	1.58	2.41	2.09	7.48	1.02	2.2	1.92
MnO	0.12	0.15	0.19	0.22	0.22	0.13	0.21	0.19	0.14	0.19	0.23	0.13	0.18	0.18	0.16	0.17	0.2	0.13	0.22	0.18	0.23	0.16	0.09	0.18	0.24	0.1	0.15	0.17	0.18	0.17	0.17	0.14	0.19	0.16	0.13	0.18	0.18	0.11	0.1	0.01	0	0.01	0.01	0.01	0.01	0.11	0.01	0.01	0.04
MgO	2.86	2.89	6.17	8.9	6.03	2.87	3.15	5	3.72	3.06	6.04	3.91	5.12	10.27	4.06	7.19	9.86	7.1	9.92	7.8	7.67	2.96	2.2	9.02	5.84	7	2.69	3.95	4.95	6.95	6.21	7.07	7.9	7.78	5.78	4.62	7.46	5.65	8.12	0.45	0.07	0.15	0.32	0.42	0.29	2.35	0.13	0.2	0.34
CaO	7.13	5.25	8.13	7.68	7.87	6.64	6.14	7.5	5.53	10.94	7.71	5.31	6.32	9.45	4.62	9.07	6.39	8.45	10.4	7.39	9.6	7.97	14.43	8.88	12.41	9.36	6.56	5.97	6.94	3.77	5.67	4.04	3.85	4.8	3.68	9.6	5	10.68	7.08	0.18	0.15	0.22	0.58	0.13	0.16	7.16	0.52	0.11	1.4
Na2O	3.53	2.82	2.11	1.6	2.48	2.89	3.19	3.33	4.52	5.08	1.65	2.95	2.82	2.14	6.59	1.97	2.5	2.13	1.61	2.23	1.98	2.62	1.66	2.96	3.06	1.95	5.32	6.46	5.45	3.73	4.51	3.92	3.55	3.81	6.47	3.12	3.7	2.34	2.03	2.59	2.09	2.44	1.17	2.66	1.98	2.59	1.17	2.42	2.2
K2O	3.638	4.889	3.098	2.612	3.573	2.743	4.642	3.645	4.069	1.087	2.41	5.347	3.481	2.667	3.028	2.92	3.653	2.843	2.032	3.424	3.722	3.116	6.927	1.959	1.591	2.874	1.809	1.983	2.442	2.685	1.798	2.588	2.548	1.967	1.02	1.223	3.063	0.681	1.233	9.082	10.369	8.942	10.853	8.953	9.442	1.917	10.876	9.061	6.828
P2O5	0.46	0.33	0.47	0.38	0.48	0.35	0.47	0.49	0.49	0.42	0.38	0.62	0.55	0.32	0.5	0.39	0.43	0.4	0.31	0.44	0.37	0.38	0.39	0.29	0.29	0.34	0.42	0.38	0.4	0.1	0.19	0.11	0.14	0.29	0.14	0.21	0.19	0.23	0.21	0.03	0.02	0.03	0.02	0.03	0.02	0.18	0.02	0.03	0.03
Rb	130	170	77	80	92	117	171	122	149	21	68	134	112	48	94	77	54	49	53	61	62	59	85	41	28	81	27	39	58	50	28	48	49	32	17	51	75	42	54	248	242	210	216	208	216	68	228	209	203
Ba	538	611	748	272	539	490	690	537	601	260	518	1159	577	546	598	438	906	568	331	844	542	527	421	385	310	443	438	1108	959	693	438	634	638	478		346	389	208	232	538	538	212	309	445	303	413	370	156	268
Nb	12	15	13	11	10	14	16	11	14	14	10	12	10	10	17	11	11	12	9	12	11	13	11	10	10	1	1	1	2	16	19	18	17	17	11	19	25	26	23	21	19	17	19	17	22	21	17	19	15
Sr	850	621	723	571	775	758	811	935	760	721	755	2920	1098	468	544	690	594	782	462	767	715	1021	623	631	599	545	620	612	684	443	410	376	444	370	400	516	284	575	459	28	20	24	22	20	19	213	23	21	60
Zr	180	229	189	176	149	173	212	122	195	174	135	109	159	124	193	123	151	171	121	180	169	154	154	152	142	110	111	137	180	206	191	160	222	150	171	179	182	194	190	298	236	237	240	289	244	263	262	239	258
Y	29	33	31	29	31	31	34	31	31	28	27	30	31	29	35	25	32	24	21	27	28	25	29	25	29	20	24	23	26	20	24	20	26	25	21	36	36	36	35	55	46	47	52	53	54	40	37	47	40
Cr	27	30	71	149	35	39	23	41	15	101	23	10	14	287	12	108	107	128	209	138	127	16	135	165	353	242	28	56	64	56	53	67	49	67	35	42	39	43	49	1	1	1	1	1	7	15	1	1	1
Ni	12	14	36	51	18	9	12	12	12	32	16	3	7	47	13	26	31	36	54	37	31	7	25	64	56	35	11	28	28	10	9	11	15	12	10	1	5	6	3	2	1	1	1	1	1	1	1	1	1
La	36	37	23	17	30	33	34	26	23	28	26	35	35	25	36	26	23	24	14	26	21	27	24	16	28	25	29	38	30	14	15	10	14	16		21	21	27	24	51	61	54	77	53	52	39	42	57	79
Ce	64	74	51	44	55	64	66	61	73	60	66	65	69	42	74	53	59	47	39	58	49	60	49	42	47	52	67	74	72	32	35	33	33	43		83	70	65	55	108	120	105	145	121	111	73	90	112	138
Nd	37	33	26	22	29	32	33	32	34	33	28	33	33	26	36	26	31	26	20	29	24	29	25	23	24	28	36	33	34	15	15	13	20	26		28	23	26	24	48	51	53	74	52	47	35	39	57	60
