# Supplementary material
Source: publisher site journal article supplement (https://static.cambridge.org/content/id/urn:cambridge.org:id:article:S0016756820000084/resource/name/S0016756820000084supp001.zip)
Supplement: Supplementary file 1 [file S0016756820000084supp001.zip › S0016756820000084supp004.xlsx]

## Sheet: S2
Geological Magazine
Triassic Magmatism in Southern Alps as an Early Phase of Pangea Break-up
by De Min A., Velicogna M., Ziberna L., Chiaradia M., Alberti A., Marzoli A.
Supplementary Table S2: Mineral composition of the selected samples
Analyses performed with a Cameca SX50 electron microprobe at the Department of Geosciences, IGG-CNR Padova
Feldspars
Sample		FS1							DO123						FC5						DO117				PR107											DO120		FC11						CD1
Label		FS1A6	FS1A7	FS1A8	FS1B1	FS1B2	FS1C4	JA02E3	DO123A4	DO123D1	DO123A5	DO123C4	DO123B4	DO123C3	FC5A1	FC5A2	FC5A3	FC5D1	FC5D2	FC5F2	DO117B1	DO117B2	DO117E4	DO117E2	PR107A2	PR107A1	PR107G1	PR107G2	PR107C2	PR107D3	plag1_1	plag1_2	plag1_3	plag1_4	plag1_5	DO120B1	DO120D2	FC11E1	FC11E2	FC11E3	FC11B3	FC11C1		CD1 plg B core-rim3_1	CD1 plg B core-rim3_2	CD1 plg B core-rim3_3	CD1 plg B core-rim3_4	CD1 plg B core-rim3_5	CD1 plg B core-rim3_6
Description		microph	microph	microph	microph core	microph rim	microph	microl	microl	microph	microl	microl	microl	microl	phen core	phen core	phen rim	microph core	microph rim	microph	phen	phen	phen	microl	megaph core	megaph rim	phen core	phen rim	phen	micol	phen core--> rim					microl	microl	phen core --> rim			microl	microl		phen core --> rim
SiO2		68.8172	64.6507	66.892	53.1197	53.7176	58.6799	48.4847	51.9103	49.1075	60.0978	55.7862	58.0391	63.8839	52.5229	54.1223	50.363	50.676	48.8324	48.2941	49.985	48.2785	48.7034	52.4468	59.5991	60.2056	58.5778	52.0661	46.4867	51.6868	47.7377	47.4294	47.9217	48.5408	46.6665	48.8071	49.6006	47.6009	47.2737	47.4394	48.9301	63.2654		47.7675	47.1485	48.7059	47.7487	48.2349	47.6115
TiO2		0	0.0031	0.0188	0.0267	0	0.0343	12.4309	0.0986	0.0502	0.0391	0.0719	0.0266	0.0423	0.035	0.0273	0.0016	0.0048	0.008	0.0225	0.0644	0.0934	0.0081	0.0644	0	0.0176	0	0.0937	0.0742	0.1359	0.0631	0.0097	0.0243	0.0566	0.0599	0.0452	0.0065	0.0518	0.0518	0.089	0.0437	0.2129		0.015	0.0007	0.0552	0.039	0.0591	0.0592
Al2O3		19.3936	20.8134	19.8978	28.9216	28.8817	26.722	15.5091	28.0599	29.8878	23.2137	24.0908	24.2995	17.7335	27.3693	27.8583	28.5156	29.5104	30.7117	30.9483	28.5366	30.2345	30.9375	27.8289	23.8857	23.6777	25.5613	29.3686	31.1611	29.0191	31.7779	31.9282	31.2969	31.1014	32.3471	31.8386	30.6667	31.6773	32.1996	31.776	30.2767	19.8882		32.9721	33.2155	32.3994	32.5675	32.5478	32.6398
Cr2O3		0	0.0126	0	0	0	0	0.0187	0.0314	0.0252	0	0.0063	0	0.0063	0	0	0.0194	0.0516	0.0773	0.0064	0	0	0.0129	0	0.0453	0.0129	0	0	0.0065	0	0	0.0194	0.0389	0	0	0	0	0	0.013	0	0.0194	0
FeO		0	0.2065	0.1584	0.1928	0.1927	0.6918	2.2639	0.9495	0.7919	0.3376	0.4599	0.5168	0.2762	0.7429	0.7262	0.7407	0.8572	1.1749	0.8972	0.9431	0.8888	0.8536	0.8587	0.2839	0.1663	0.0633	0.6447	0.8756	0.7724	0.8466	0.8331	0.8646	0.9053	0.7835	1.0125	0.9594	0.9597	0.8201	1.1979	0.9465	0.4826		0.714	0.7857	0.7346	0.7501	0.7989	0.7192
MnO		0.0977	0	0.0752	0.039	0.0876	0.0797	0.0347	0.0379	0.0097	0	0.0652	0	0	0.0227	0	0	0.0269	0	0	0.016	0.003	0	0.021	0.034	0	0.0532	0.021	0.012	0	0	0.005	0.015	0.004	0	0	0	0.0651	0.0321	0.0761	0	0
MgO		0.0227	0.0171	0.062	0	0	0.2955	0.4111	1.0461	0.0782	0.0057	0.0579	0.169	0	0.0849	0.0476	0.0874	0.1024	0.409	0.1105	0.1321	0.0688	0.0843	0.1262	0	0	0.0036	0.0641	0.0662	0.2907	0.0663	0.0661	0.1109	0.0839	0.0398	0.0778	0.1036	0.0445	0.0437	0.0673	0.0961	0.0159		0.0907	0.1614	0.085	0.083	0.0797	0.0937
CaO		0.2867	1.2377	0.9839	12.3456	12.3852	2.2386	14.7474	11.0719	15.1306	5.7981	7.6191	6.9783	0.6598	12.0382	11.4033	13.4552	13.586	13.431	15.8341	13.1564	15.5332	15.5425	12.1069	6.082	5.8401	8.1102	12.9946	16.7817	13.2796	16.8868	17.0538	16.562	16.0152	17.6715	15.9818	15.258	16.2573	16.7925	16.6761	15.5294	2.303		15.9041	16.701	15.5258	15.7881	15.7266	15.9418
Na2O		11.0658	9.5528	10.2976	3.8959	3.9227	5.6776	3.1691	3.6936	2.7428	7.578	7.1607	6.8436	4.1074	4.2729	4.4423	3.4789	3.3869	2.538	2.5555	3.1999	2.2361	2.1429	3.6398	7.1264	7.5377	6.9027	3.8356	1.792	3.6295	1.8303	1.4264	1.956	2.0431	1.3604	2.0031	2.4652	1.877	1.6285	1.8582	2.3295	5.1142		1.9837	1.8039	2.5744	2.4072	2.3579	2.1929
K2O		0.2079	1.4651	0.5115	0.2598	0.3036	3.9459	1.1208	0.3766	0.1308	0.9716	0.9247	0.9401	10.3559	0.5644	0.7536	0.5627	0.3679	1.0293	0.1008	0.4926	0.337	0.3246	0.8329	0.8178	0.8072	0.2104	0.3239	0.1937	0.315	0.1739	0.1828	0.2201	0.1896	0.1264	0.2459	0.3273	0.1883	0.206	0.1663	0.2874	7.4181		0.2283	0.1961	0.3338	0.2294	0.2121	0.253
TOT		99.8916	97.959	98.8972	98.8011	99.4911	98.3653	98.1904	97.2758	97.9547	98.0416	96.2427	97.813	97.0653	97.6532	99.3809	97.2245	98.5701	98.2116	98.7694	96.5261	97.6733	98.6098	97.9256	97.8742	98.2651	99.4825	99.4123	97.4497	99.129	99.3826	98.9539	99.0104	98.9399	99.0551	100.012	99.3873	98.7219	99.061	99.3463	98.4588	98.7003		99.6754	100.013	100.414	99.613	100.017	99.5111
Pyroxenes
Sample	FS1							FC5					DO117			PR107	DO120			FC11						CD1
Label	FS1A1	FS1A4	FS1A2	FS1A3	FS1C1	FS1C2	FS1C3	FC5B3	FC5B4	FC5C1	FC5C2	FC5C3	DO117C1	DO117C2	DO117E3	PR107C1	DO120A1	DO120A2	DO120D1	FC11A3	FC11A4	FC11B1	FC11B2	FC11C2		CD1 cpx A core-rim1_1	CD1 cpx A core-rim1_2	CD1 cpx A core-rim1_3	CD1 cpx A core-rim1_4	CD1 cpx A core-rim1_5	CD1 cpx A core-rim1_6	CD1 cpx A core-rim1_7	CD1 cpx A core-rim1_8	CD1 cpx A core-rim1_9	CD1 cpx A core-rim1_10	CD1 cpx A core-rim1_11	CD1 cpx A core-rim1_12	CD1 cpx A core-rim1_13	CD1 cpx A core-rim1_14	CD1 cpx A core-rim1_15	CD1 cpx A core-rim1_16	CD1 cpx A core-rim1_17	CD1 cpx A core-rim1_18	CD1 cpx A core-rim1_19	CD1 cpx A core-rim1_20	CD1 cpx A core-rim1_21	CD1 cpx A core-rim1_22	CD1 cpx A core-rim1_23	CD1 cpx A core-rim1_24
Description	microph core	microph rim	microph	microph	microph core	microph rim	microph	phen core	phen rim	phen core	phen interm	phen rim	phen core	phen rim	microl	phen	phen core	phen rim	microph	phen core	phen rim	phen core	phen rim	microph		Phen core --> rim
SiO2	50.7112	50.2811	52.7077	49.7605	47.3685	48.5909	49.3636	51.3667	50.8484	51.0832	51.4741	51.8105	49.8578	50.346	47.8409	49.6479	51.6212	50.8542	51.6045	49.7779	49.6063	51.2267	50.2951	50.7256		50.0478	49.948	49.7322	49.8737	49.8498	49.8671	49.5437	49.7177	49.2161	49.8018	49.9789	49.6045	50.2027	49.6578	49.4631	47.8537	49.8969	49.0412	49.7536	49.6226	49.6109	49.6688	48.8921	49.6272
TiO2	0.8224	1.1142	0.4076	1.1189	1.7718	1.4634	1.0492	0.2981	0.4009	0.5122	0.4728	0.4703	0.6688	0.6327	1.727	0.7311	0.5169	0.5367	0.4907	0.8111	0.988	0.6791	0.8807	0.7264		0.9342	0.9041	0.9691	0.8802	0.8845	0.9283	0.9123	0.8728	0.9589	0.8544	0.8476	0.9302	0.8462	0.9129	0.9483	0.7843	0.7937	1.0819	0.9071	1.0808	0.9407	0.9033	0.9718	0.8866
Al2O3	4.2671	5.1128	2.0105	5.7791	8.0017	6.8811	5.0296	2.1512	2.8685	2.5419	2.1088	2.2974	3.1198	3.5085	4.422	2.9619	2.8069	3.561	2.101	3.882	4.4352	3.1588	3.9778	3.6987		3.4787	3.3763	3.5165	3.3226	3.3993	3.2374	3.5524	3.7685	4.4181	3.3245	3.4077	3.8411	3.3343	4.0038	4.0615	3.2298	3.4411	4.6286	3.8114	3.5872	3.4172	3.4851	4.1672	3.784
Cr2O3	0.0803	0.0185	0.0247	0.2537	0.0123	0.1236	0.1731	0.1582	0.5528	0.0438	0	0.025	0.0378	0.0126	0	0.0187	0.0253	0.038	0	0.0508	0.076	0.0887	0.108	0.019		0.1663	0.1689	0.0739	0.1294	0.111	0.1249	0.132	0.0439	0.0462	0.0533	0.1275	0.0649	0.1485	0.0463	0.0602	0.2113	0.1508	0.0532	0.1252	0.1366	0.1597	0.146	0.088	0.2019
FeO	8.1141	7.9754	7.9858	7.431	7.9896	7.108	7.0168	7.8446	6.491	11.3766	12.5237	12.1259	9.5875	9.3435	12.4293	10.0308	10.2574	9.2586	11.301	8.2936	9.2176	9.0427	8.9049	8.7465		10.0635	9.5148	9.949	9.9357	9.6456	9.5884	9.3459	9.6908	9.7281	9.1988	9.1428	9.2924	8.9832	9.1644	9.3912	8.6145	8.851	9.6538	9.1849	9.5331	9.4485	9.2044	9.4495	8.7819
MnO	0.3268	0.2168	0.2171	0.2585	0.1864	0.2146	0.2253	0.2627	0.2681	0.3719	0.474	0.4548	0.2551	0.203	0.3106	0.2753	0.3117	0.2048	0.4308	0.2713	0.2877	0.2029	0.2123	0.2397		0.3269	0.3039	0.3362	0.2701	0.2552	0.311	0.2012	0.2155	0.2274	0.3007	0.2675	0.2448	0.188	0.2712	0.2077	0.244	0.186	0.2792	0.215	0.2275	0.2978	0.1732	0.268	0.2656
MgO	15.4131	15.7285	17.8385	15.1442	13.4857	14.1735	15.2518	15.8351	15.9759	14.3509	14.1323	14.3306	14.4118	14.1771	11.0674	13.7934	14.4146	14.4281	15.0418	14.0164	13.6562	14.2167	13.9202	14.268		14.4762	14.4885	14.6999	14.8306	14.8425	14.8063	14.1715	14.4484	14.2393	14.6529	14.5368	14.628	14.6697	14.3211	14.2981	14.9223	14.9983	13.867	14.3645	14.1731	14.3691	14.4221	14.0942	14.2842
CaO	19.8923	19.7444	18.4926	20.2875	20.7479	21.0131	20.8391	20.7248	21.2472	19.2367	18.2904	19.1672	20.3888	20.1851	20.6734	20.9317	20.3332	21.2679	18.6803	21.5478	21.3539	21.2619	21.5794	21.67		20.0129	20.0733	20.0412	19.9376	20.3497	20.0809	20.4142	20.0117	20.0451	20.5974	20.764	20.4479	20.8499	20.2065	20.6124	21.4265	20.7346	20.6676	20.7079	20.5244	20.5766	20.7352	20.7695	20.8051
Na2O	0.1845	0.1743	0.1142	0.098	0.1851	0.1394	0.2034	0.1648	0.2389	0.247	0.2448	0.2865	0.3262	0.3107	0.3433	0.2611	0.3302	0.2831	0.1883	0.2855	0.333	0.1958	0.2478	0.307		0.2736	0.3098	0.2916	0.2955	0.3477	0.3087	0.2713	0.2827	0.3058	0.2931	0.2268	0.3155	0.3009	0.3297	0.2838	0.2765	0.2629	0.3049	0.2264	0.3088	0.3473	0.3318	0.2936	0.1661
K2O	0.0012	0	0.011	0.0049	0.0146	0	0	0.0312	0.0125	0	0	0	0	0.0075	0.0235	0	0.0025	0.0088	0	0.0175	0	0.0013	0	0.0213
TOT	99.813	100.366	99.8097	100.136	99.7636	99.7076	99.1519	98.8374	98.9042	99.7642	99.7209	100.968	98.6536	98.7267	98.8374	98.6519	100.62	100.441	99.8384	98.9539	99.9539	100.075	100.126	100.422		99.7801	99.0876	99.6096	99.4754	99.6853	99.253	98.5445	99.052	99.185	99.0769	99.2996	99.3693	99.5234	98.9137	99.3263	97.5629	99.3153	99.5774	99.296	99.1941	99.1678	99.0699	98.9939	98.8026
Olivine
Sample	FC11							CD2
Label	FC11C3	FC11C4	FC11F3	FC11F4	FC11F1	FC11F2	FC11A1	CD2 ol c core	CD2 ol c rim
Description	Phen	Phen	Phen	Phen	Phen	Phen	Microl	Phen core	Phen rim
SiO2	37.9547	36.8936	37.0019	36.5209	35.7742	36.9668	36.5447	37.5941	37.43
TiO2	0.0422	0.0373	0.0359	0.0816	0.0178	0.0253	0
Al2O3	0.0271	0.0427	0.0099	0	0	0	0.0211	0.03	0.04
Cr2O3	0	0	0.1209	0	0.051	0.0456	0
FeO	28.0384	32.5128	30.6309	35.0466	34.9595	33.3854	33.375	24.44	24.89
MnO	0.577	0.6147	0.7048	0.7184	0.6491	0.6835	0.7393	0.49	0.41
MgO	34.3428	31.0415	31.5407	28.1431	28.6347	29.6488	29.2548	37.41	37.79
CaO	0.2864	0.3664	0.362	0.4114	0.395	0.3618	0.3773	0.26	0.32
Na2O	0.0044	0	0.0129	0.0033	0	0.0599	0.0007	0.06	0
K2O	0	0	0.0303	0	0.0213	0.005	0.0113
TOT	101.273	101.509	100.45	100.925	100.503	101.182	100.324	100.284	100.88
Amphibole
Sample	DO123								PR107
Label	DO123A1	DO123A2	DO123A3	DO123B1	DO123B2	DO123B3	DO123C1	DO123C2	PR107B1	PR107B2	PR107B3	PR107D2	PR107D1	0001_1	PR107E1	0001_2
Description	Phen	Phen	Phen	Phen	Phen	Phen	Phen	Phen core	Megaph core	Megaph rim	Megaph rim	Megaph core	Megaph rim	Phen core --> rim
SiO2	39.2605	39.2242	39.2855	37.5484	38.5131	39.5323	38.8849	38.7883	37.8756	37.6679	40.1817	38.3349	38.3967	38.5146	38.4044	38.8182
TiO2	4.8963	4.1385	3.7653	5.973	5.4832	4.3125	4.6803	4.9308	3.7517	3.6128	4.4457	3.921	3.7733	3.9055	4.0627	4.5335
Al2O3	13.5851	13.3244	14.5259	12.648	13.0924	13.4626	14.3187	12.7824	15.0496	15.175	14.9327	15.1133	15.1131	14.6847	15.0191	14.1808
Cr2O3	0.1216	0.2864	0.3466	0.0243	0.0121	0.0974	0	0	0	0	0.0251	0	0	0	0	0
FeO	10.3752	9.4507	9.5983	10.6106	12.8169	9.6669	10.8669	13.0656	18.4982	18.5426	10.057	17.4824	17.5735	16.423	15.8401	15.0467
MnO	0.0248	0.1566	0.1517	0.2046	0.1461	0.104	0.1038	0.221	0.2524	0.2891	0.176	0.2735	0.289	0.2614	0.2334	0.225
MgO	13.16	14.2029	14.0096	12.213	11.5395	13.664	12.8851	11.4976	7.2694	7.037	13.0453	7.9917	7.8702	8.7524	8.5846	9.8751
CaO	11.8525	11.1387	9.5174	12.7058	11.973	11.4524	11.4773	12.0975	10.062	10.2003	10.9373	10.3793	10.3538	10.496	10.6326	10.7306
Na2O	2.4005	2.2795	1.9507	2.4177	2.6157	2.2249	2.4533	2.5034	2.3953	2.5429	2.4816	2.8306	2.6885	2.7711	2.62	2.5558
K2O	1.1672	1.286	1.2286	1.16	1.2737	1.1963	1.3041	1.0496	1.3606	1.4609	1.4906	1.3892	1.428	1.3685	1.3938	1.227
TOT	96.8437	95.4879	94.3796	95.5054	97.4657	95.7133	96.9744	96.9362	96.5148	96.5285	97.773	97.7159	97.4861	97.1772	96.7907	97.1927
[truncated: 99 more columns]
