# Supplementary material
Source: publisher site journal article supplement (https://static.cambridge.org/content/id/urn:cambridge.org:id:article:S0016756820000084/resource/name/S0016756820000084supp001.zip)
Supplement: Supplementary file 1 [file S0016756820000084supp001.zip › S0016756820000084supp005.pdf]

**Triassic Magmatism in Southern Alps as an Early Phase of Pangea Break-up**

**by De Min A., Velicogna M., Ziberna L., Chiaradia M., Alberti A. & Marzoli A.**

**Supplementary Figure S6**

This figure shows the  $^{87}\text{Sr}/^{86}\text{Sr}$  vs  $^{143}\text{Nd}/^{144}\text{Nd}$  diagram for the magmatic rocks in Southern Alps as proposed by Bianchini *et al.* (2018). The lamprophyre PR107 (Predazzo) plots close to the Calceranica Lamprophyre and the VVP Anorogenic Tertiary lavas area while the lamprophyre DO123 plots to lower  $^{143}\text{Nd}/^{144}\text{Nd}$  values and close to the less contaminated basalts. Basaltic samples from this work show lower  $^{87}\text{Sr}/^{86}\text{Sr}$  and slightly higher  $^{143}\text{Nd}/^{144}\text{Nd}$  values with respect to the samples studied by Bonadiman *et al.* (1994) and Casetta *et al.* (2018b), which suggest a higher grade of crustal contamination for the latter. The Valsugana dykes show much a more variable  $^{87}\text{Sr}/^{86}\text{Sr}$  interval, which extend toward an Upper Crustal composition. Notably, the high L.O.I. values of these samples (3.55–8.52 wt%; Bianchini *et al.* 2018) might suggest that they have been affected by significant secondary alteration. In order to emphasize the differences among the studied samples in the  $^{87}\text{Sr}/^{86}\text{Sr}$  vs  $^{143}\text{Nd}/^{144}\text{Nd}$  diagram (Fig. 7a) only the Karawanken (Visonà & Zanferrari, 2000; Miller *et al.* 2011), Finero (Lu *et al.* 1997a) and Mt. Monzoni (Bonadiman *et al.* 1994) have been considered.

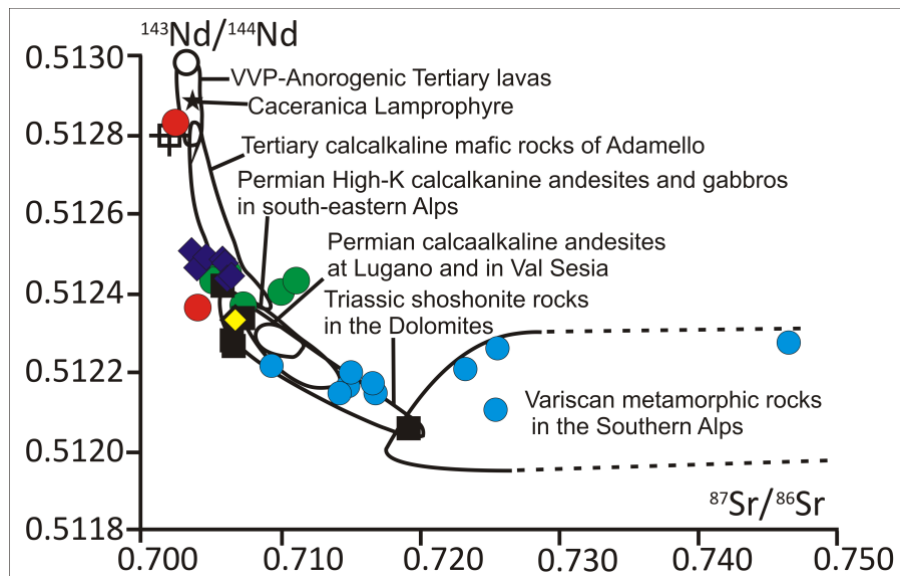

Suppl. Fig. S6:  $^{143}\text{Nd}/^{144}\text{Nd}$  vs  $^{87}\text{Sr}/^{86}\text{Sr}$  diagram, modified after Bianchini *et al.* (2018). Green circles represent the Predazzo intrusive complex studied by Casetta *et al.* (2018b), black circles are the Valsugana dykes (Bianchini *et al.* 2018) and the other symbols are the samples from this work (see Figure 7).
