# Supplementary material
Source: publisher site journal article supplement (https://static.cambridge.org/content/id/urn:cambridge.org:id:article:S0016756820000084/resource/name/S0016756820000084supp001.zip)
Supplement: Supplementary file 1 [file S0016756820000084supp001.zip › S0016756820000084supp006.pdf]

**Triassic Magmatism in Southern Alps as an Early Phase of Pangea Break-up**

by De Min A., Velicogna M., Ziberna L., Chiaradia M., Alberti A. & Marzoli A.

**Supplementary Figure S5**

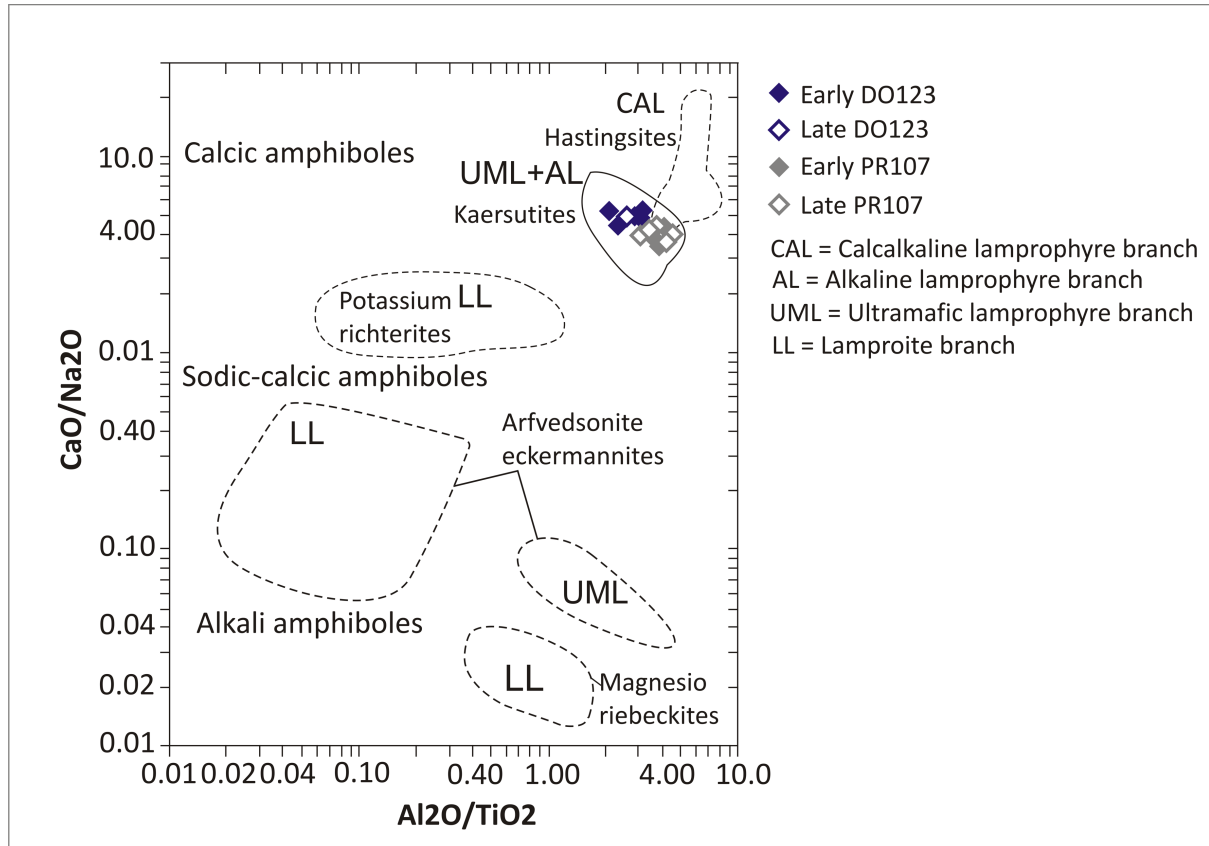

Amphibole classification diagram after Rock (1987)
